# Supplementary material for: In Vitro Modeling of CD8 T Cell Exhaustion Enables CRISPR Screening to Reveal a Role for BHLHE40
Source: PubMed Central journal article supplement — bioRxiv. 2023 Apr 17:2023.04.17.537229. Preprint. [Version 1] doi: 10.1101/2023.04.17.537229 (PMC10153201; doi:10.1101/2023.04.17.537229), 2023-04-17
Supplement: NIHPP2023.04.17.537229v1-supplement-1.pdf [file NIHPP2023.04.17.537229v1-supplement-1.pdf]

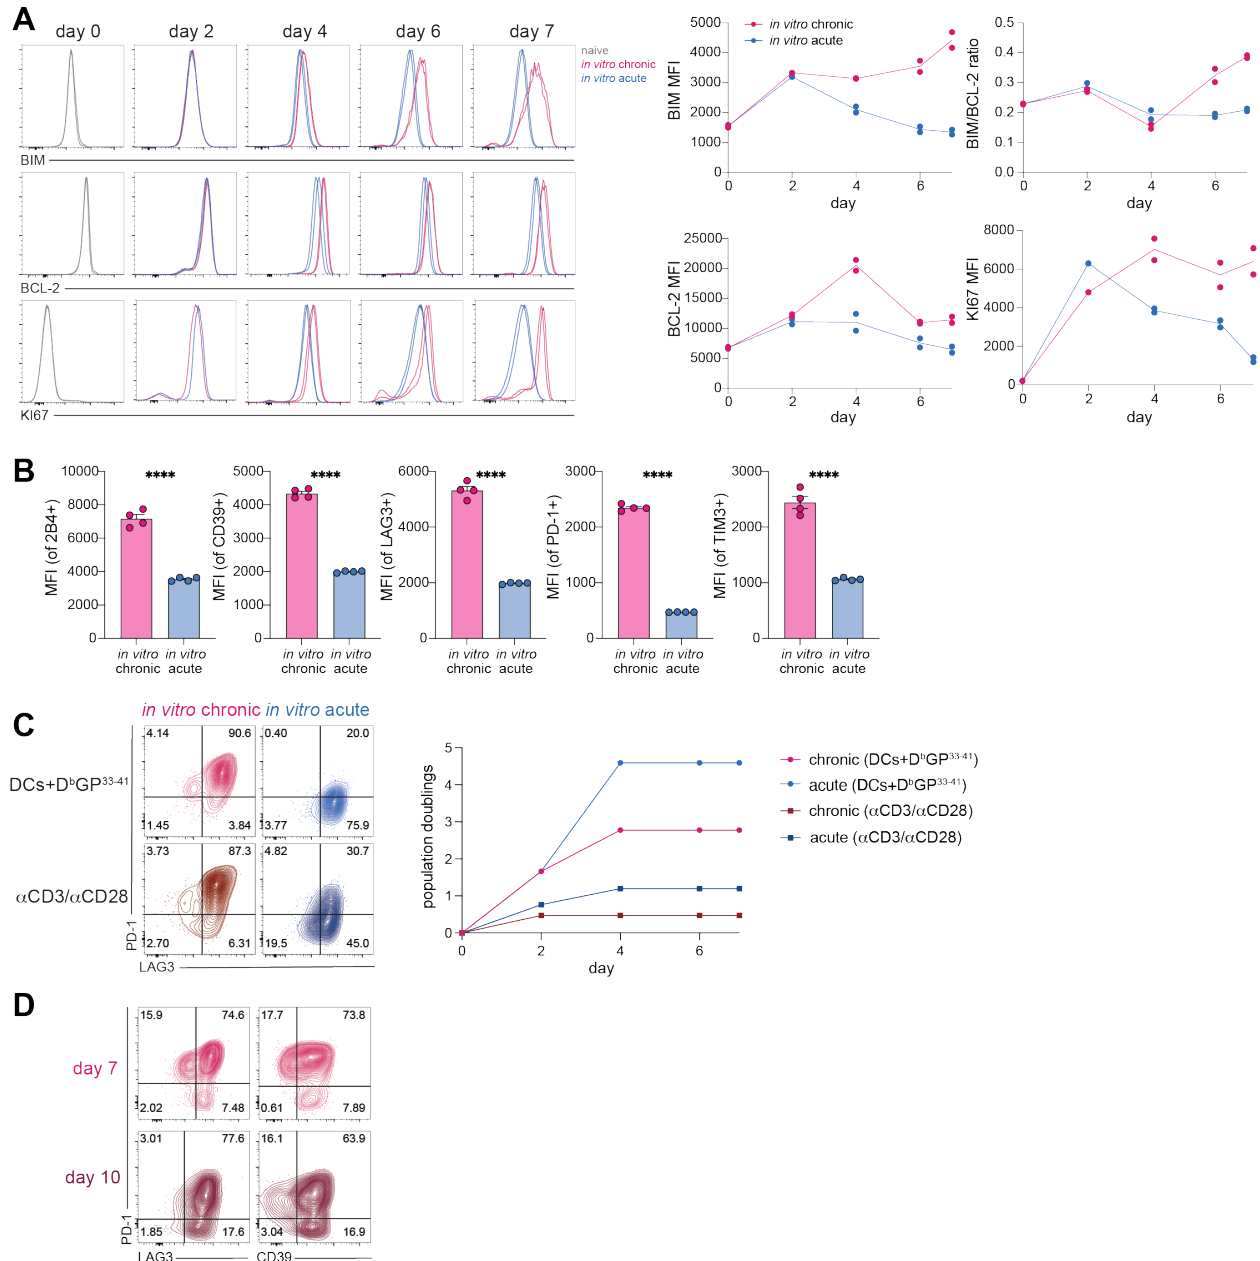

**Fig. S1. Chronic antigenic stimulation *in vitro* induces high per-cell IR expression** (A) [left] Histograms and [right] summary data of longitudinal expression of BIM, BCL-2, and KI67 by *in vitro* chronically and acutely stimulated P14 cells. (B) Summary data indicating MFI (gated on IR<sup>+</sup> population of CD44<sup>hi</sup> CD8<sup>+</sup> live singlets) of IRs after chronic and acute stimulation of P14 cells *in vitro*. Significance calculated by unpaired two-tailed t test; \*\*\*\*p < 0.0001. (C) [left] Representative flow cytometry data of IR expression (gated on CD44<sup>hi</sup> CD8<sup>+</sup> live singlets) and [right] cell expansion after chronic and acute stimulation, either via DCs+D<sup>b</sup>GP<sup>33-41</sup> or αCD3/αCD28. (D) Representative flow cytometry data of IR expression (gated on CD44<sup>hi</sup> CD8<sup>+</sup> live singlets) after chronic stimulation for either 7 or 10 days.

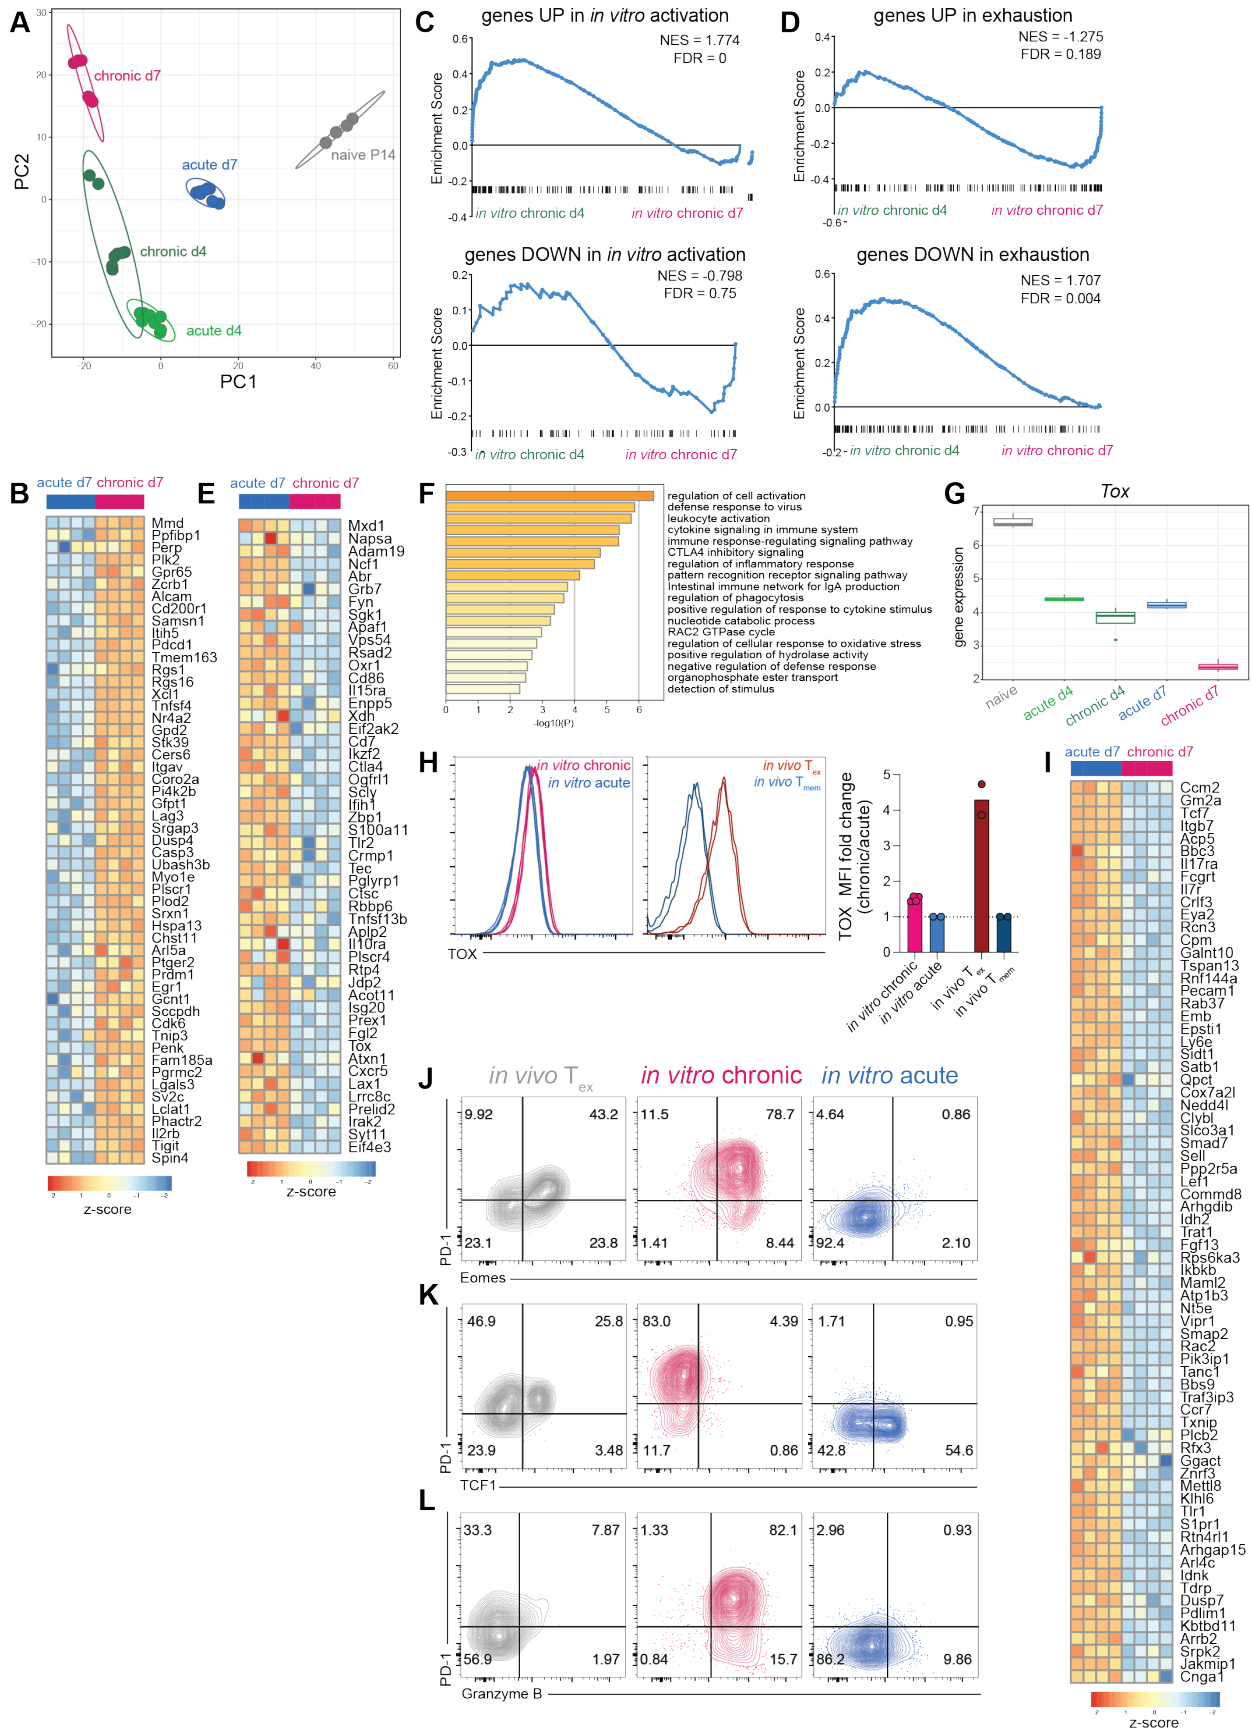

**Fig. S2. *In vitro* chronically stimulated P14 cells develop a transcriptional signature of T<sub>ex</sub>**

**(A)** PCA of RNA-seq data from *in vitro* chronically and acutely stimulated P14 cells. **(B)** Gene expression of leading edge genes upregulated in *in vivo* T<sub>ex</sub> enriched after chronic stimulation *in vitro*. **(C-D)** GSEA of gene sets for **(C)** *in vitro* activation and **(D)** exhaustion (41) in *in vitro* chronically stimulated cells at d4 and d7. **(E)** Heatmap and **(F)** GO analysis of genes upregulated in *in vivo* T<sub>ex</sub> that were not enriched after chronic stimulation *in vitro*. **(G)** Gene expression of *Tox* in *in vitro* chronically and acutely stimulated P14 cells. **(H)** [left] TOX protein expression in *in vitro* chronically and acutely stimulated P14 cells and *in vivo* T<sub>ex</sub> and T<sub>mem</sub>. [right] Fold change of TOX MFI in *in vitro* chronic over acute and *in vivo* T<sub>ex</sub> over T<sub>mem</sub>. **(I)** Gene expression of leading edge of genes downregulated in *in vivo* T<sub>ex</sub> enriched after chronic stimulation *in vitro*. **(J-L)** Representative flow cytometry data detailing co-expression of PD-1 and **(J)** Eomes, **(K)** TCF1, and **(L)** Granzyme B on *in vivo* T<sub>ex</sub> (LCMV-C113 30dpi), *in vitro* chronically stimulated P14 cells, and *in vitro* acutely stimulated P14 cells (all gated on CD44<sup>hi</sup> CD8<sup>+</sup> live singlets). Numbers in flow cytometry plots indicate percentage of parent population within each gate.

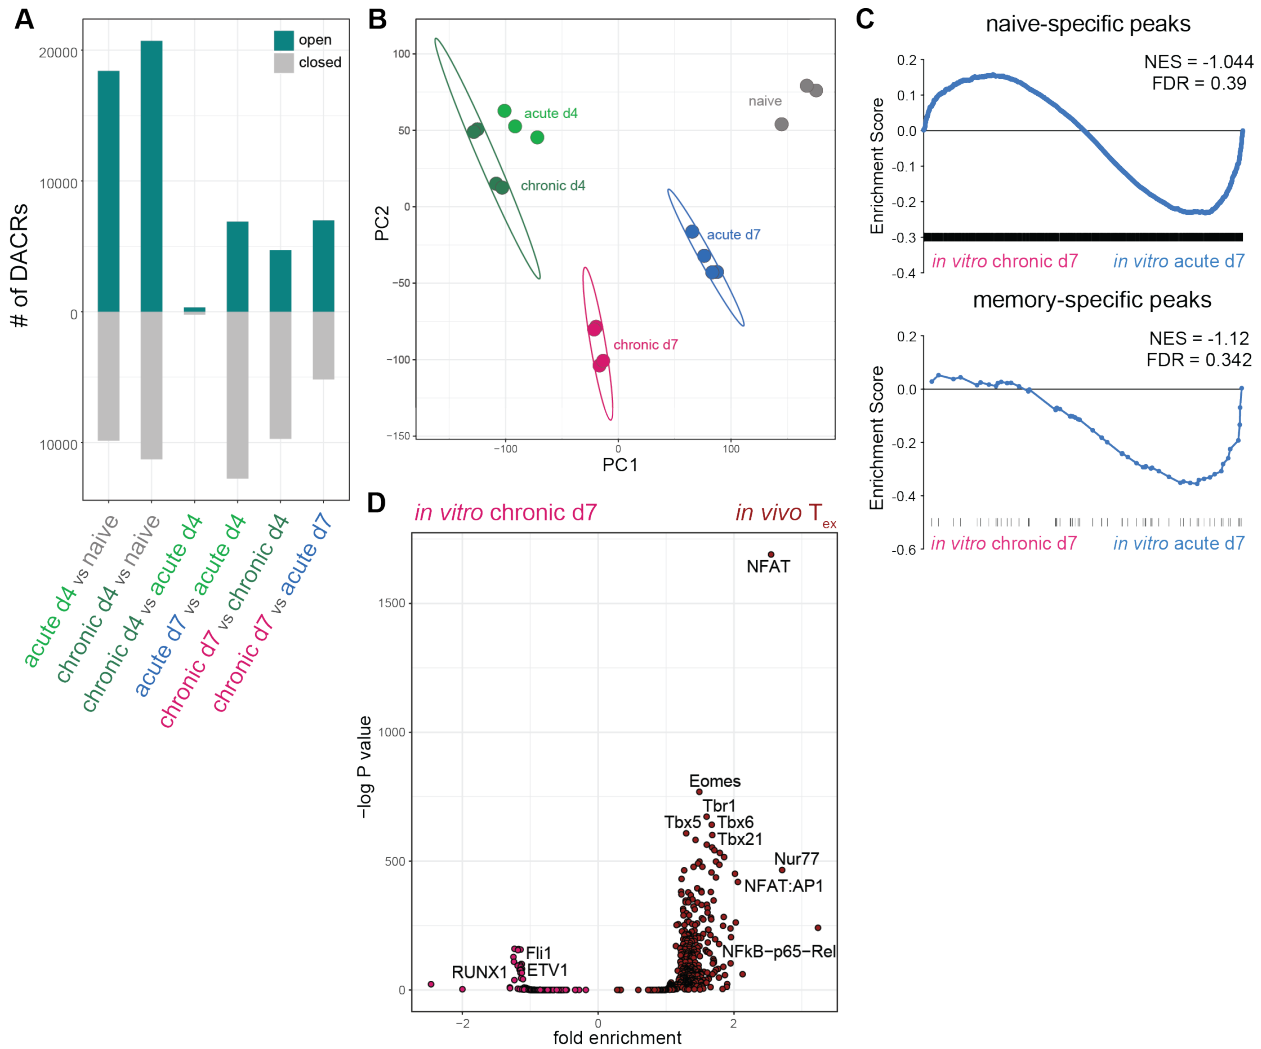

**Fig. S3. *In vitro* chronically stimulated P14 cells develop epigenetic signatures of T<sub>eff</sub> and T<sub>ex</sub>**

**(A)** Number of DACRs (filtered on  $lfc > 1$  and  $p < 0.05$ ) between pairwise comparisons as indicated. **(B)** PCA of ATAC-seq data from *in vitro* chronically and acutely stimulated P14 cells. **(C)** PSEA of naive- and memory-specific ACRs in *in vitro* chronically and acutely stimulated P14 cells. **(D)** TF motif accessibility in DACRs between *in vitro* chronically stimulated P14 cells and *in vivo* T<sub>ex</sub>.

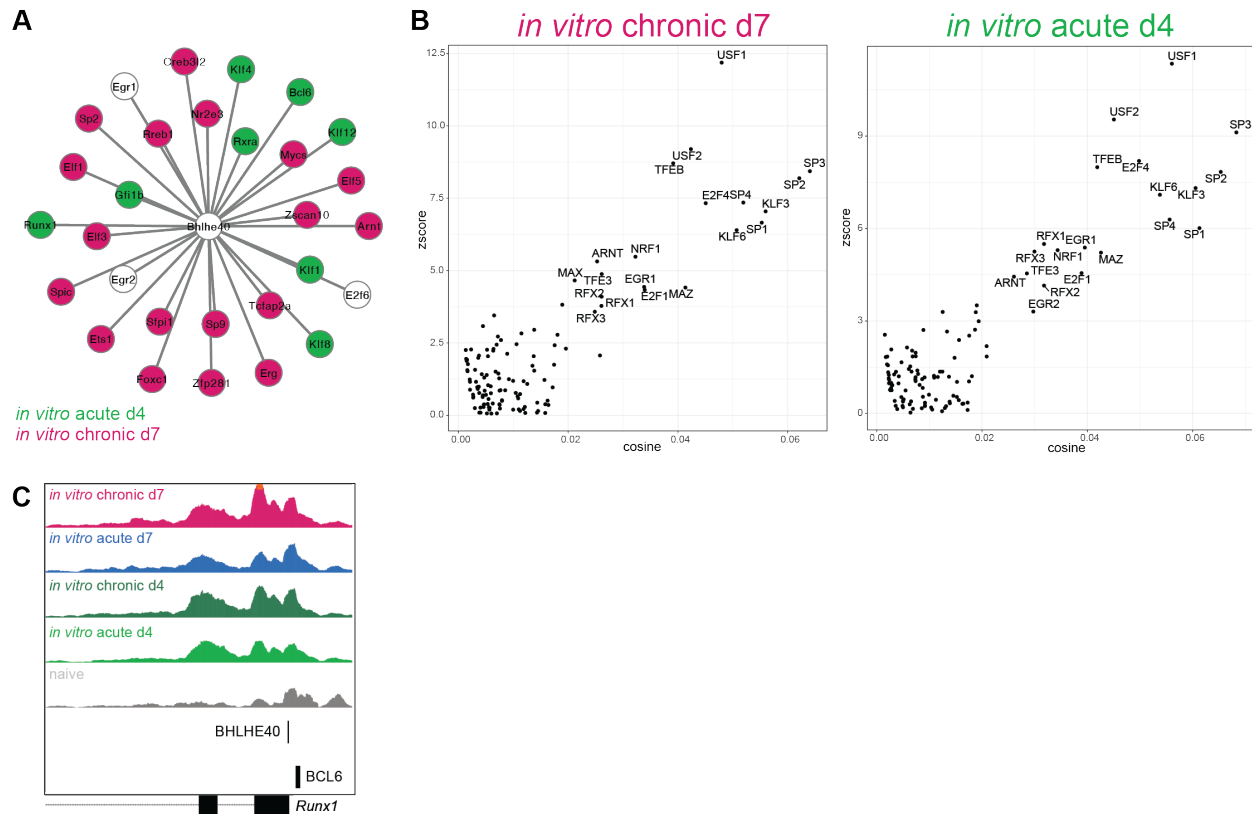

**Fig. S4. BHLHE40 is predicted to regulate known transcriptional networks associated with CD8 T cell exhaustion**

**(A)** Taiji analysis of differential transcriptional networks downstream of BHLHE40 at d7 of chronic stimulation *in vitro* and d4 of acute stimulation *in vitro*. Shared downstream TFs indicated in white. **(B)** TF motifs that co-occur with BHLHE40 motifs. **(C)** ATAC-seq signal tracks for *in vitro* chronically and acutely stimulated P14 cells for the *Runx1* locus; binding motifs for BHLHE40 and BCL6 shown below.

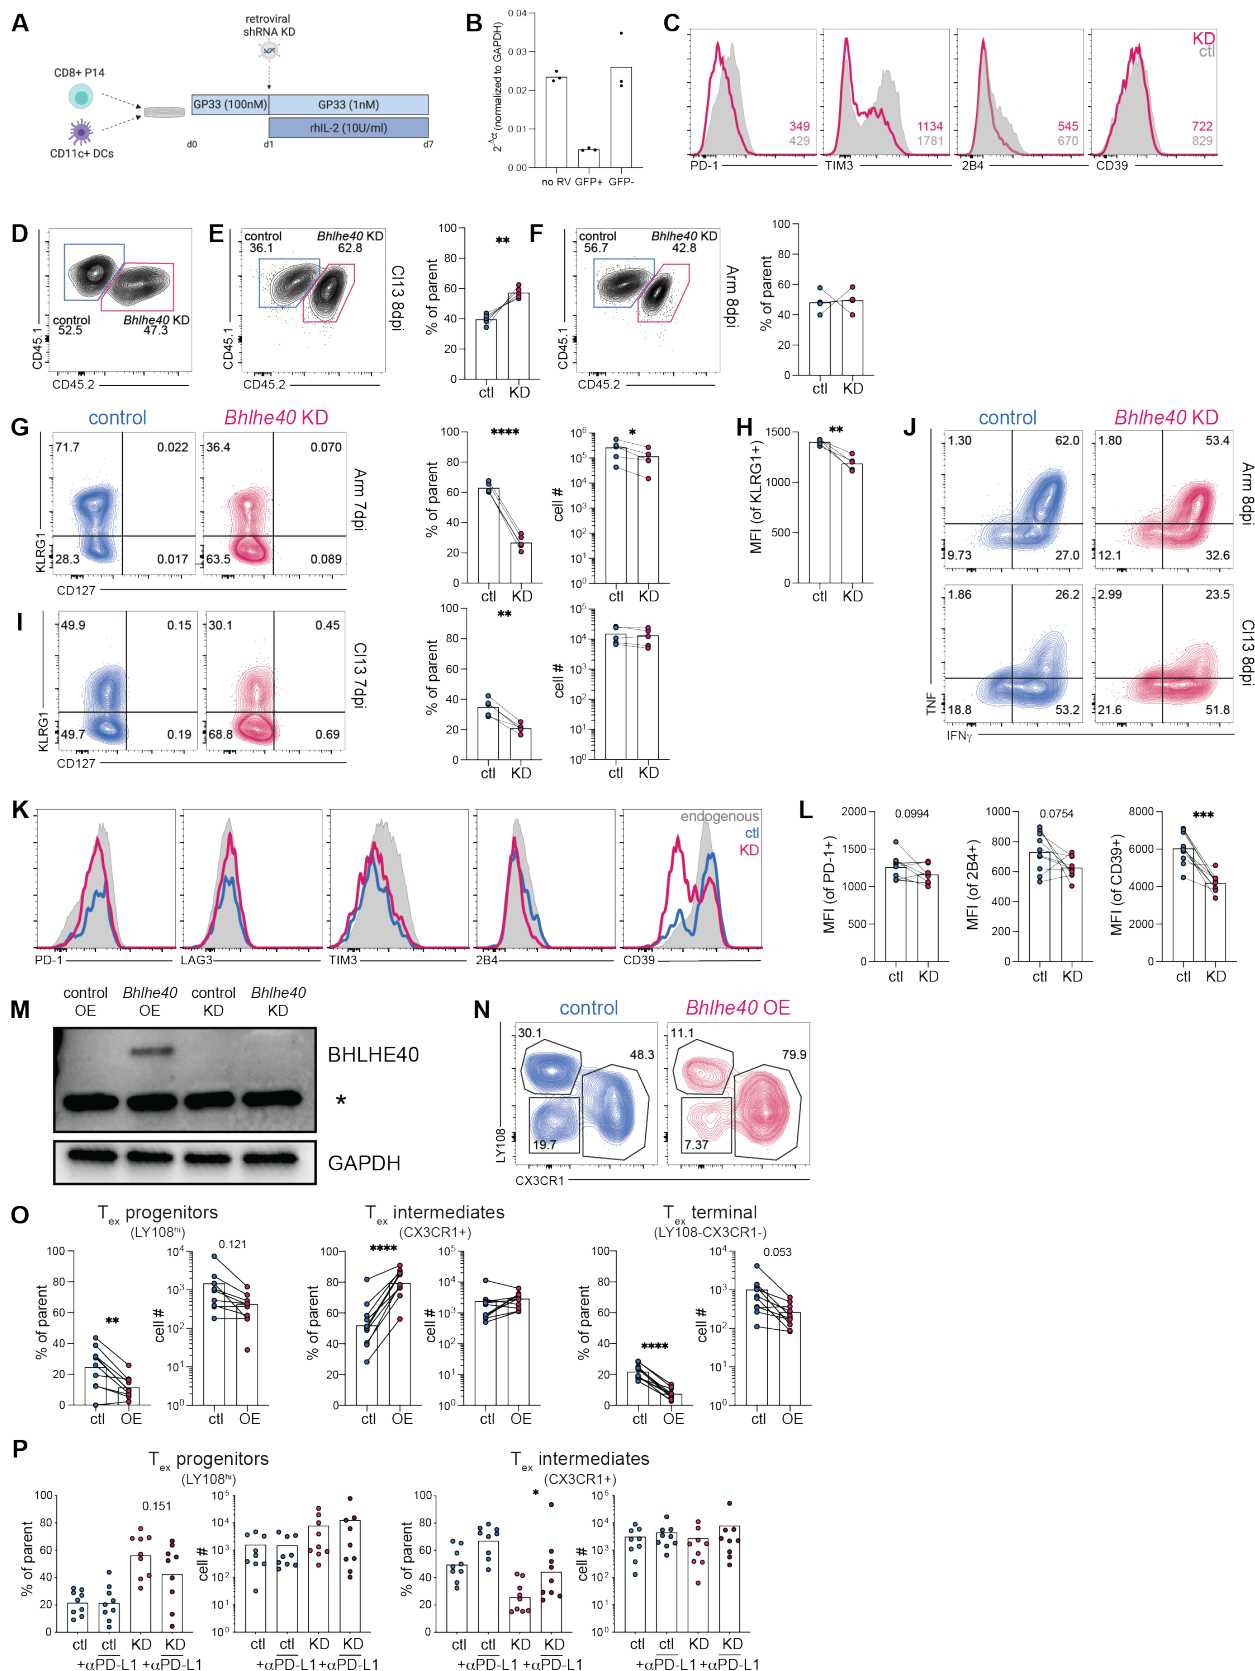

**Fig. S5. BHLHE40 is a novel transcriptional regulator of CD8 T cell differentiation**

**(A)** Experiment schematic of shRNA KD of *Bhlhe40* in *in vitro* chronically stimulated P14 cells. **(B)** Relative mRNA expression after *in vitro* *Bhlhe40* KD. **(C)** Representative flow cytometry histograms detailing IR expression by control and *Bhlhe40* KD P14 cells (gated on GFP+ CD44<sup>hi</sup> CD8+ live singlets) after chronic stimulation *in vitro*. Mean fluorescence intensity (MFI) of each population indicated in lower right; representative of 2 experiments. **(D)** Representative flow cytometry plot of control and *Bhlhe40* KD input P14 cells (gated on GFP+ CD44<sup>hi</sup> CD8+ live singlets) before transfer. **(E,F)** [left] Concatenated flow cytometry plot and [right] summary data of frequency of control and *Bhlhe40* KD P14 cells at 8dpi of **(E)** LCMV-CI13 and **(F)** LCMV-Arm. **(G,I)** [left] Concatenated flow cytometry plots and [right] summary data of frequency and total number of KLRG1+ control and *Bhlhe40* KD P14 cells at 7dpi of **(G)** LCMV-Arm or **(I)** LCMV-CI13. **(H)** MFI of KLRG1 (gated on KLRG1+ population) in control and *Bhlhe40* KD P14 cells at 7dpi of LCMV-Arm. **(J)** Concatenated flow cytometry plots of effector cytokine production in control and *Bhlhe40* KD P14 cells at 8dpi of [top] LCMV-Arm and [bottom] -CI13. **(K)** Concatenated flow cytometry histograms detailing IR expression on endogenous (gated on GFP- gp33+ CD44<sup>hi</sup> CD8+ live singlets), control, and *Bhlhe40* KD P14 cells at 31dpi of LCMV-CI13. **(L)** Summary data indicating MFI (gated on IR+ population) of IRs on control and *Bhlhe40* KD P14 cells at 31dpi of LCMV-CI13. **(M)** Protein expression of BHLHE40 after *in vitro* overexpression (OE) and KD of *Bhlhe40*; \* indicates non-specific binding. **(N)** Concatenated flow cytometry plots and **(O)** summary data of frequency of T<sub>ex</sub> subsets in control and *Bhlhe40* OE P14 cells at 31dpi of LCMV-CI13. **(P)** Frequency and total number of progenitor and intermediate T<sub>ex</sub> in control and *Bhlhe40* KD P14 cells at 37dpi of LCMV-CI13, after treatment with vehicle control or  $\alpha$ PD-L1 from 22-35dpi. **(E-L,N-P)** n=5 mice (Arm), n=10 mice (CI13), representative of 3 experiments. Significance calculated by paired two-tailed t test; \*p<0.05, \*\*p<0.01, \*\*\*p<0.001, \*\*\*\*p<0.0001. **(D-J,N)** Numbers in flow cytometry plots indicate percentage of parent population within each gate.
